# Supplementary material for: Landscape and Vegetation Patterns Zoning Is a Methodological Tool for Management Costs Implications Due to Xylella fastidiosa Invasion
Source: MDPI journal article supplement (doi:10.3390/land11071105), 2022-07-19
Supplement: s1 [file s1]

## Supplementary File S1. Analysis of variance

### NDVI (NDVI\_mean)

| Descriptives - NDVI_mean |       |       |      |
|--------------------------|-------|-------|------|
| Classes                  | Mean  | SD    | N    |
| 1                        | 0.286 | 0.068 | 6046 |
| 2                        | 0.341 | 0.095 | 2674 |
| 3                        | 0.344 | 0.057 | 5757 |
| 4                        | 0.300 | 0.065 | 5579 |
| 5                        | 0.295 | 0.062 | 4508 |
| 6                        | 0.325 | 0.060 | 4401 |

### ANOVA - NDVI\_mean

| Cases                         | Sum of Squares | df    | Mean Square | F       | p      |
|-------------------------------|----------------|-------|-------------|---------|--------|
| Classes                       | 15.344         | 5     | 3.069       | 695.876 | < .001 |
| Residuals                     | 127.709        | 28959 | 0.004       |         |        |
| Note. Type III Sum of Squares |                |       |             |         |        |

| Post Hoc Comparisons - NDVI_mean |   |                 |                            |              |              |               |
|----------------------------------|---|-----------------|----------------------------|--------------|--------------|---------------|
| Classes                          |   | Mean Difference | 95% CI for Mean Difference |              | SE           | t             |
|                                  |   |                 | Lower                      | Upper        |              |               |
| 1                                | 2 | -0.055          | -0.059                     | -0.051       | 0.002        | -35.661       |
|                                  | 3 | -0.058          | -0.062                     | -0.055       | 0.001        | -47.727       |
|                                  | 4 | -0.014          | -0.017                     | -0.010       | 0.001        | -11.010       |
|                                  | 5 | -0.009          | -0.012                     | -0.005       | 0.001        | -6.510        |
|                                  | 6 | -0.039          | -0.043                     | -0.035       | 0.001        | -29.652       |
| 2                                | 3 | <b>-0.003</b>   | <b>-0.008</b>              | <b>0.001</b> | <b>0.002</b> | <b>-2.165</b> |
|                                  | 4 | 0.041           | 0.037                      | 0.046        | 0.002        | 26.522        |
|                                  | 5 | 0.046           | 0.042                      | 0.051        | 0.002        | 28.683        |
|                                  | 6 | 0.016           | 0.011                      | 0.021        | 0.002        | 9.816         |
| 3                                | 4 | 0.045           | 0.041                      | 0.048        | 0.001        | 35.902        |
|                                  | 5 | 0.050           | 0.046                      | 0.054        | 0.001        | 37.750        |
|                                  | 6 | 0.019           | 0.016                      | 0.023        | 0.001        | 14.550        |
| 4                                | 5 | 0.005           | 0.001                      | 0.009        | 0.001        | 3.810         |
|                                  | 6 | -0.025          | -0.029                     | -0.022       | 0.001        | -19.004       |
| 5                                | 6 | -0.031          | -0.035                     | -0.027       | 0.001        | -21.681       |

Note. P-value and confidence intervals adjusted for comparing a family of 6 estimates (confidence intervals corrected using the Tukey method).

# Intensity (IntOL\_mean)

| Descriptives - IntOL_mean |       |       |      |
|---------------------------|-------|-------|------|
| Classes                   | Mean  | SD    | N    |
| 1                         | 0.371 | 0.112 | 6034 |
| 2                         | 0.917 | 0.321 | 2671 |
| 3                         | 0.583 | 0.223 | 5757 |
| 4                         | 0.267 | 0.074 | 5575 |
| 5                         | 0.333 | 0.106 | 4501 |
| 6                         | 0.286 | 0.135 | 4396 |

| ANOVA - IntOL_mean |                |       |             |          |        |
|--------------------|----------------|-------|-------------|----------|--------|
| Cases              | Sum of Squares | df    | Mean Square | F        | p      |
| Classes            | 1071.088       | 5     | 214.218     | 7750.429 | < .001 |
| Residuals          | 799.554        | 28928 | 0.028       |          |        |

*Note.* Type III Sum of Squares

| Post Hoc Comparisons - IntOL_mean |   |                 |                            |        |       |          |
|-----------------------------------|---|-----------------|----------------------------|--------|-------|----------|
| Classes                           |   | Mean Difference | 95% CI for Mean Difference |        | SE    | t        |
|                                   |   |                 | Lower                      | Upper  |       |          |
| 1                                 | 2 | -0.546          | -0.557                     | -0.535 | 0.004 | -141.291 |
|                                   | 3 | -0.212          | -0.221                     | -0.203 | 0.003 | -69.175  |
|                                   | 4 | 0.105           | 0.096                      | 0.113  | 0.003 | 33.877   |
|                                   | 5 | 0.039           | 0.029                      | 0.048  | 0.003 | 11.801   |
|                                   | 6 | 0.085           | 0.075                      | 0.094  | 0.003 | 25.741   |
| 2                                 | 3 | 0.334           | 0.323                      | 0.345  | 0.004 | 85.822   |
|                                   | 4 | 0.651           | 0.639                      | 0.662  | 0.004 | 166.283  |
|                                   | 5 | 0.585           | 0.573                      | 0.596  | 0.004 | 143.956  |
|                                   | 6 | 0.631           | 0.619                      | 0.642  | 0.004 | 154.653  |
| 3                                 | 4 | 0.317           | 0.308                      | 0.325  | 0.003 | 101.318  |
|                                   | 5 | 0.251           | 0.241                      | 0.260  | 0.003 | 75.735   |
|                                   | 6 | 0.297           | 0.287                      | 0.306  | 0.003 | 89.113   |
| 4                                 | 5 | -0.066          | -0.075                     | -0.056 | 0.003 | -19.807  |
|                                   | 6 | -0.020          | -0.029                     | -0.010 | 0.003 | -5.894   |
| 5                                 | 6 | 0.046           | 0.036                      | 0.056  | 0.004 | 13.111   |

*Note.* P-value and confidence intervals adjusted for comparing a family of 6 estimates (confidence intervals corrected using the Tukey method).

## Diversity (DivCo\_mean)

| Descriptives - DivCo_mean |       |       |      |
|---------------------------|-------|-------|------|
| Classes                   | Mean  | SD    | N    |
| 1                         | 0.574 | 0.104 | 6034 |
| 2                         | 0.664 | 0.144 | 2671 |
| 3                         | 0.664 | 0.152 | 5757 |
| 4                         | 0.594 | 0.097 | 5575 |
| 5                         | 0.560 | 0.139 | 4501 |
| 6                         | 0.537 | 0.124 | 4396 |

| ANOVA - DivCo_mean |                |       |             |         |        |
|--------------------|----------------|-------|-------------|---------|--------|
| Cases              | Sum of Squares | df    | Mean Square | F       | p      |
| Classes            | 63.457         | 5     | 12.691      | 797.607 | < .001 |
| Residuals          | 460.299        | 28928 | 0.016       |         |        |

*Note.* Type III Sum of Squares

| Post Hoc Comparisons – DivCo_mean |   |                 |                            |              |              |              |
|-----------------------------------|---|-----------------|----------------------------|--------------|--------------|--------------|
| Classes                           |   | Mean Difference | 95% CI for Mean Difference |              | SE           | t            |
|                                   |   |                 | Lower                      | Upper        |              |              |
| 1                                 | 2 | –0.090          | –0.098                     | –0.082       | 0.003        | –30.720      |
|                                   | 3 | –0.090          | –0.097                     | –0.083       | 0.002        | –38.722      |
|                                   | 4 | –0.020          | –0.027                     | –0.014       | 0.002        | –8.613       |
|                                   | 5 | 0.014           | 0.007                      | 0.021        | 0.002        | 5.797        |
|                                   | 6 | 0.038           | 0.030                      | 0.045        | 0.003        | 14.999       |
| 2                                 | 3 | <b>6.850e-5</b> | <b>–0.008</b>              | <b>0.008</b> | <b>0.003</b> | <b>0.023</b> |
|                                   | 4 | 0.070           | 0.061                      | 0.078        | 0.003        | 23.540       |
|                                   | 5 | 0.104           | 0.096                      | 0.113        | 0.003        | 33.904       |
|                                   | 6 | 0.128           | 0.119                      | 0.136        | 0.003        | 41.224       |
| 3                                 | 4 | 0.070           | 0.063                      | 0.077        | 0.002        | 29.451       |
|                                   | 5 | 0.104           | 0.097                      | 0.112        | 0.003        | 41.593       |
|                                   | 6 | 0.128           | 0.120                      | 0.135        | 0.003        | 50.466       |
| 4                                 | 5 | 0.035           | 0.027                      | 0.042        | 0.003        | 13.682       |
|                                   | 6 | 0.058           | 0.050                      | 0.065        | 0.003        | 22.677       |
| 5                                 | 6 | 0.023           | 0.015                      | 0.031        | 0.003        | 8.642        |

*Note.* P-value and confidence intervals adjusted for comparing a family of 6 estimates (confidence intervals corrected using the Tukey method).

Landscape elements (EIPAgr\_mean)

| Descriptives - EIPAgr_mean |       |       |      |
|----------------------------|-------|-------|------|
| Classes                    | Mean  | SD    | N    |
| 1                          | 0.259 | 0.120 | 6034 |
| 2                          | 0.308 | 0.159 | 2671 |
| 3                          | 0.897 | 0.125 | 5757 |
| 4                          | 0.074 | 0.061 | 5575 |
| 5                          | 0.692 | 0.167 | 4501 |
| 6                          | 0.263 | 0.161 | 4396 |

| ANOVA - EIPAgr_mean |                |       |             |           |        |
|---------------------|----------------|-------|-------------|-----------|--------|
| Cases               | Sum of Squares | df    | Mean Square | F         | p      |
| Classes             | 2605.784       | 5     | 521.157     | 29860.265 | < .001 |
| Residuals           | 504.886        | 28928 | 0.017       |           |        |

*Note.* Type III Sum of Squares

| Post Hoc Comparisons - EIPAgr_mean |          |                 |                            |              |              |               |
|------------------------------------|----------|-----------------|----------------------------|--------------|--------------|---------------|
| Classes                            |          | Mean Difference | 95% CI for Mean Difference |              | SE           | t             |
|                                    |          |                 | Lower                      | Upper        |              |               |
| 1                                  | 2        | -0.049          | -0.058                     | -0.041       | 0.003        | -16.102       |
|                                    | 3        | -0.638          | -0.645                     | -0.631       | 0.002        | -262.034      |
|                                    | 4        | 0.185           | 0.178                      | 0.192        | 0.002        | 75.236        |
|                                    | 5        | -0.433          | -0.440                     | -0.426       | 0.003        | -166.392      |
|                                    | <b>6</b> | <b>-0.004</b>   | <b>-0.011</b>              | <b>0.004</b> | <b>0.003</b> | <b>-1.409</b> |
| 2                                  | 3        | -0.588          | -0.597                     | -0.580       | 0.003        | -190.223      |
|                                    | 4        | 0.234           | 0.225                      | 0.243        | 0.003        | 75.296        |
|                                    | 5        | -0.384          | -0.393                     | -0.374       | 0.003        | -118.851      |
|                                    | 6        | 0.046           | 0.037                      | 0.055        | 0.003        | 14.115        |
| 3                                  | 4        | 0.822           | 0.815                      | 0.829        | 0.002        | 331.303       |
|                                    | 5        | 0.205           | 0.197                      | 0.212        | 0.003        | 77.927        |
|                                    | 6        | 0.634           | 0.627                      | 0.642        | 0.003        | 239.630       |
| 4                                  | 5        | -0.618          | -0.625                     | -0.610       | 0.003        | -233.289      |
|                                    | 6        | -0.188          | -0.196                     | -0.181       | 0.003        | -70.677       |
| 5                                  | 6        | 0.429           | 0.421                      | 0.437        | 0.003        | 153.227       |

*Note.* P-value and confidence intervals adjusted for comparing a family of 6 estimates (confidence intervals corrected using the Tukey method).

# Altitude (dtm20\_mean)

| Descriptives - dtm20_mean |         |         |      |
|---------------------------|---------|---------|------|
| Classes                   | Mean    | SD      | N    |
| 1                         | 63.395  | 30.642  | 6046 |
| 2                         | 147.113 | 104.853 | 2674 |
| 3                         | 322.897 | 87.119  | 5757 |
| 4                         | 45.247  | 18.646  | 5579 |
| 5                         | 90.772  | 31.290  | 4508 |
| 6                         | 85.652  | 51.313  | 4401 |

| ANOVA - dtm20_mean |                |       |             |           |        |
|--------------------|----------------|-------|-------------|-----------|--------|
| Cases              | Sum of Squares | df    | Mean Square | F         | p      |
| Classes            | 2.972e+8       | 5     | 5.944e+7    | 17802.940 | < .001 |
| Residuals          | 9.669e+7       | 28959 | 3338.758    |           |        |

*Note.* Type III Sum of Squares

| Post Hoc Comparisons - dtm20_mean |                 |                            |          |          |       |          |
|-----------------------------------|-----------------|----------------------------|----------|----------|-------|----------|
|                                   |                 | 95% CI for Mean Difference |          |          | SE    | t        |
| Classes                           | Mean Difference | Lower                      | Upper    |          |       |          |
| 1                                 | 2               | -83.718                    | -87.542  | -79.894  | 1.342 | -62.385  |
|                                   | 3               | -259.502                   | -262.534 | -256.470 | 1.064 | -243.885 |
|                                   | 4               | 18.148                     | 15.091   | 21.205   | 1.073 | 16.918   |
|                                   | 5               | -27.377                    | -30.617  | -24.136  | 1.137 | -24.077  |
|                                   | 6               | -22.257                    | -25.519  | -18.994  | 1.145 | -19.439  |
| 2                                 | 3               | -175.784                   | -179.638 | -171.931 | 1.352 | -129.995 |
|                                   | 4               | 101.866                    | 97.993   | 105.739  | 1.359 | 74.953   |
|                                   | 5               | 56.341                     | 52.322   | 60.360   | 1.410 | 39.947   |
|                                   | 6               | 61.461                     | 57.424   | 65.499   | 1.417 | 43.381   |
| 3                                 | 4               | 277.650                    | 274.557  | 280.744  | 1.086 | 255.771  |
|                                   | 5               | 232.126                    | 228.851  | 235.400  | 1.149 | 201.995  |
|                                   | 6               | 237.246                    | 233.949  | 240.543  | 1.157 | 205.057  |
| 4                                 | 5               | -45.525                    | -48.822  | -42.227  | 1.157 | -39.341  |
|                                   | 6               | -40.405                    | -43.724  | -37.085  | 1.165 | -34.684  |
| 5                                 | 6               | 5.120                      | 1.631    | 8.609    | 1.224 | 4.182    |

*Note.* P-value and confidence intervals adjusted for comparing a family of 6 estimates (confidence intervals corrected using the Tukey method).
